# Supplementary material for: School trajectory disruption among adolescents living with perinatal HIV receiving antiretroviral treatments: a case-control study in Thailand
Source: PubMed Central journal article supplement (PMC7818931; doi:10.1186/s12889-021-10189-x), 2021-01-21
Supplement: 12889_2021_10189_MOESM1_ESM.pdf [file 12889_2021_10189_MOESM1_ESM.pdf]

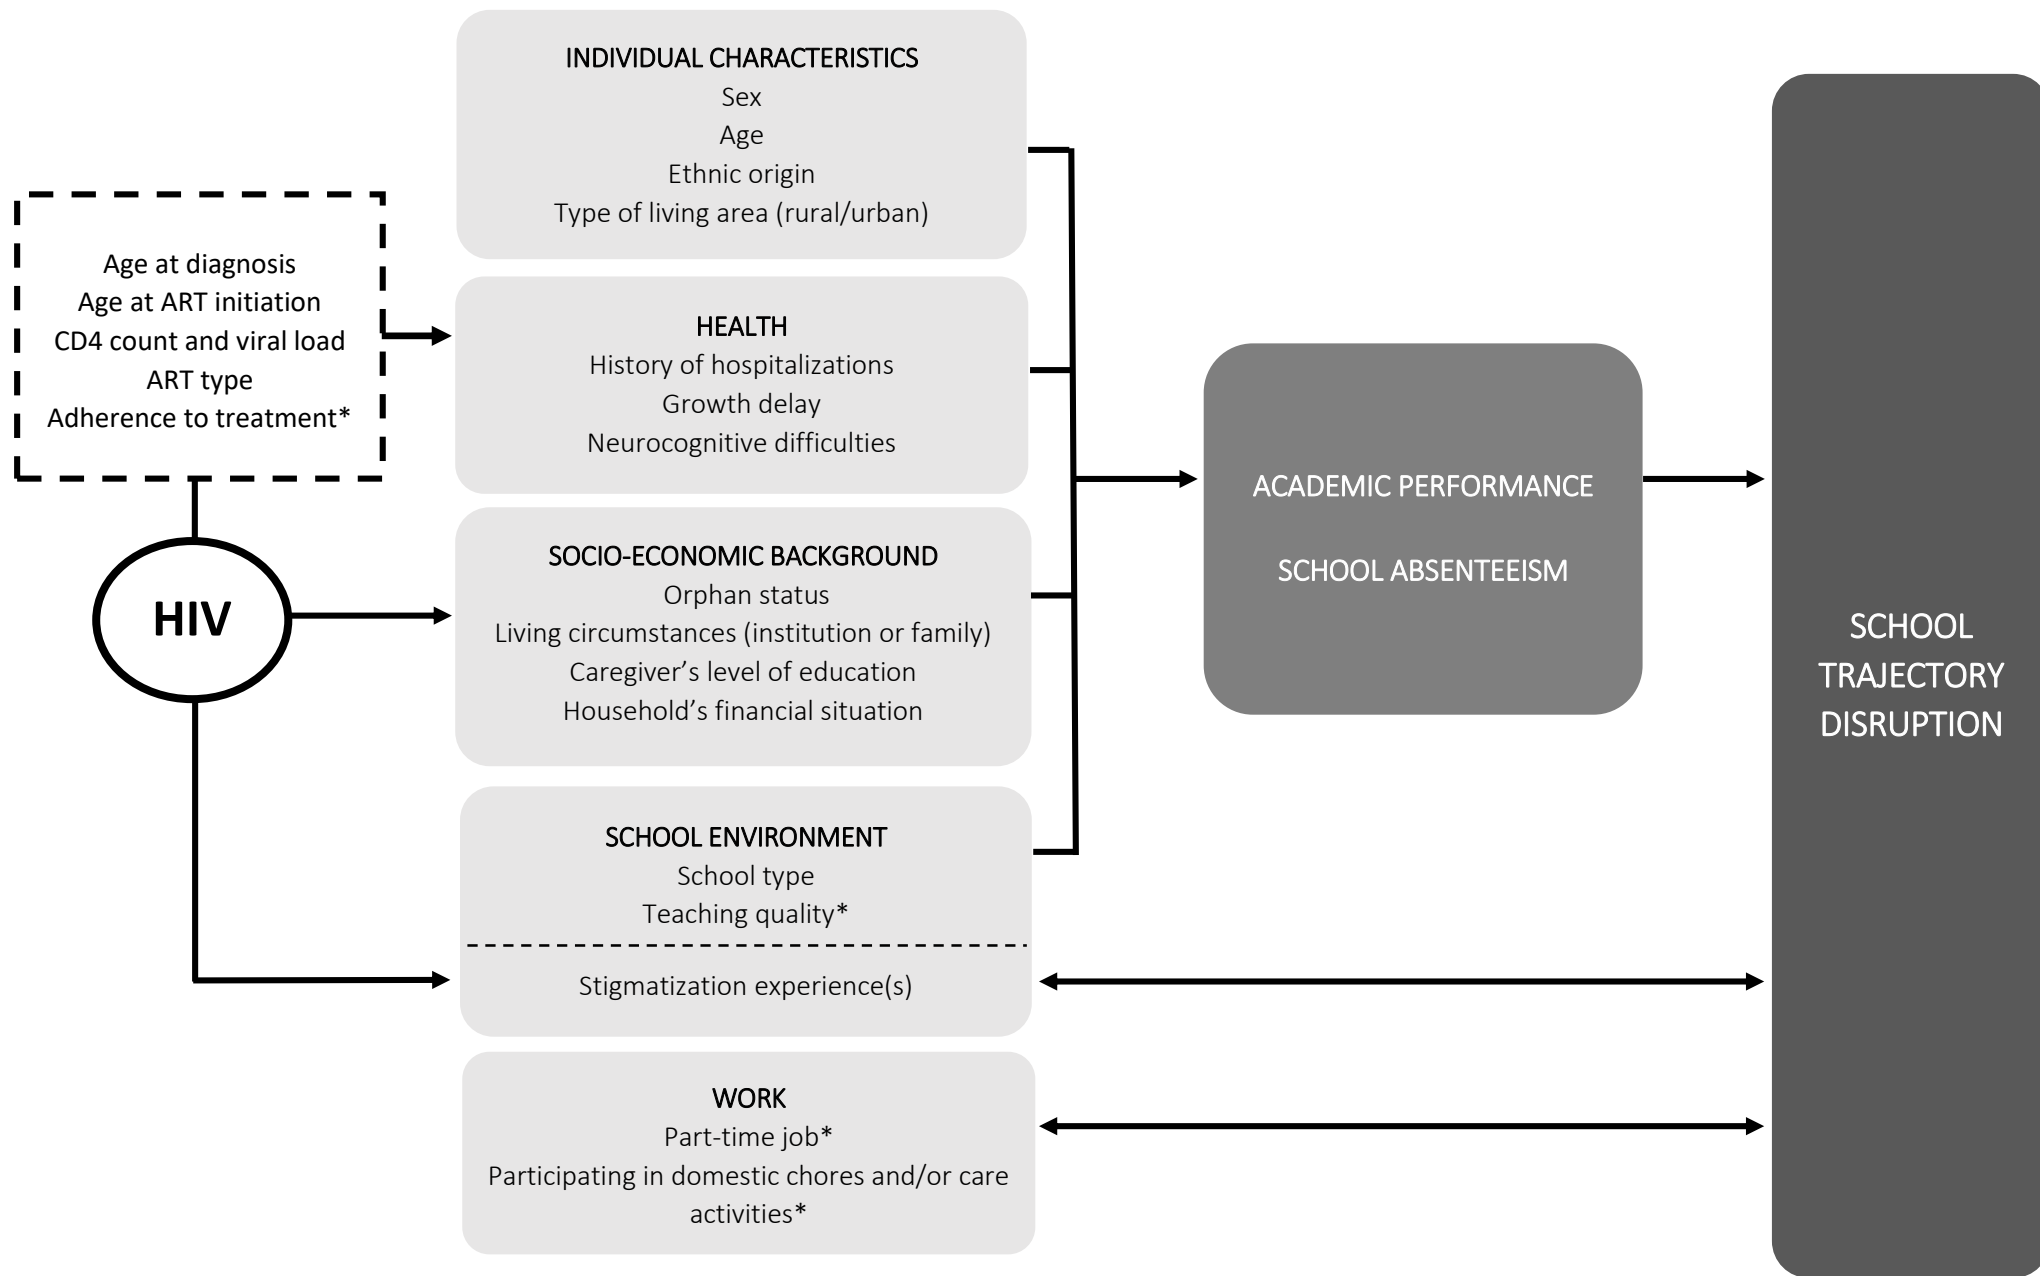

\*: Factors not included
